# Supplementary material for: Endophytic Bacteria from Salt Marsh Plants as Potential Agents for Heavy Metal Bioremediation: A Preliminary Investigation of Siderophore Production and Metal Removal Efficiency
Source: Research Square preprint supplement (doi:10.21203/rs.3.rs-8154776/v1), 2025-12-15
Supplement: Supplementary file 1 [file 3ba56e31f8f335263b6620f2.docx]

**Supplementary file:**


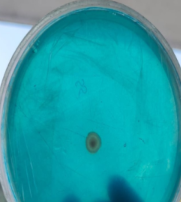

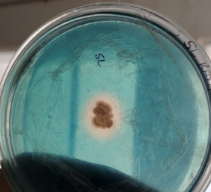

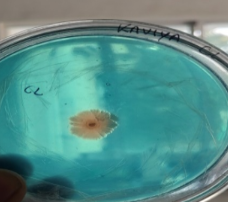

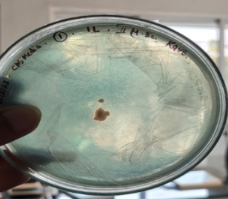


a) IL b) CL c) SL d) SS

Figure S1a-d: Absence of halos around the colonies indicating the production of siderophores by the isolates IL, CL, SL and SS

Figure S2-4: Optimization of Culture conditions for the production of siderophores by strain SR


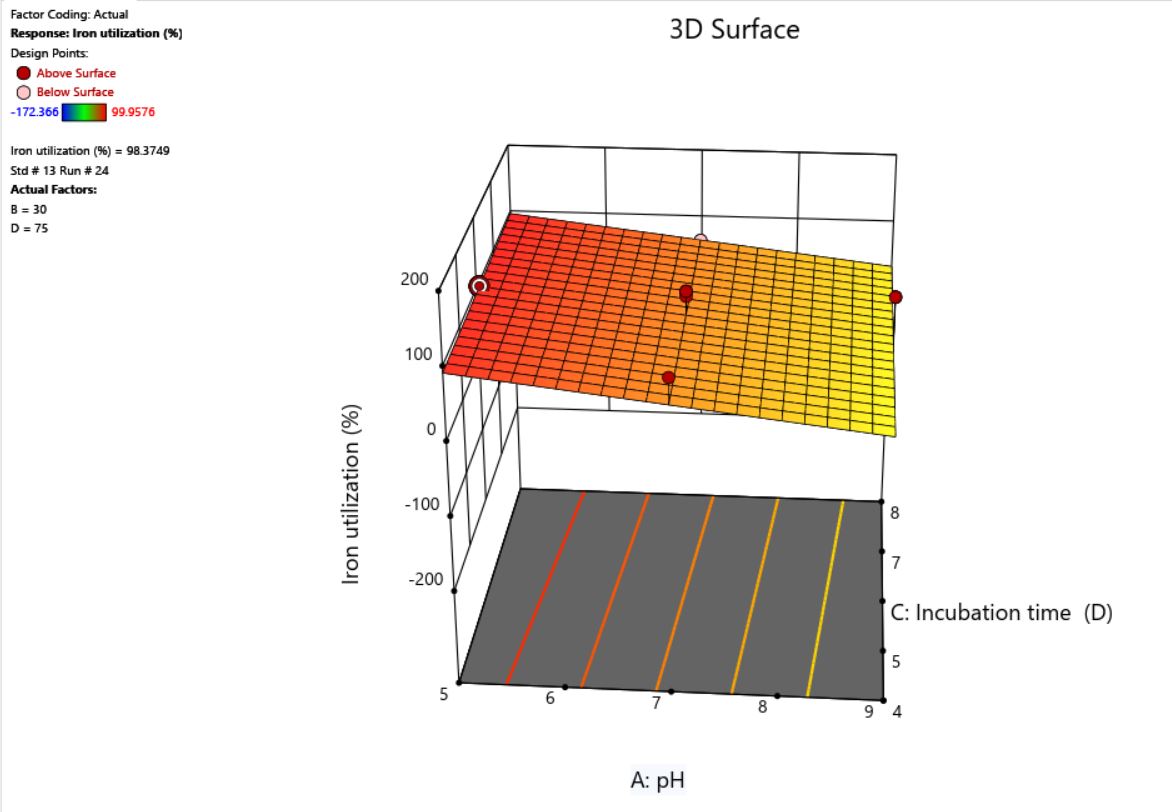


**Siderophore Production %**

**A. pH**

**C. Incubation time (D)**


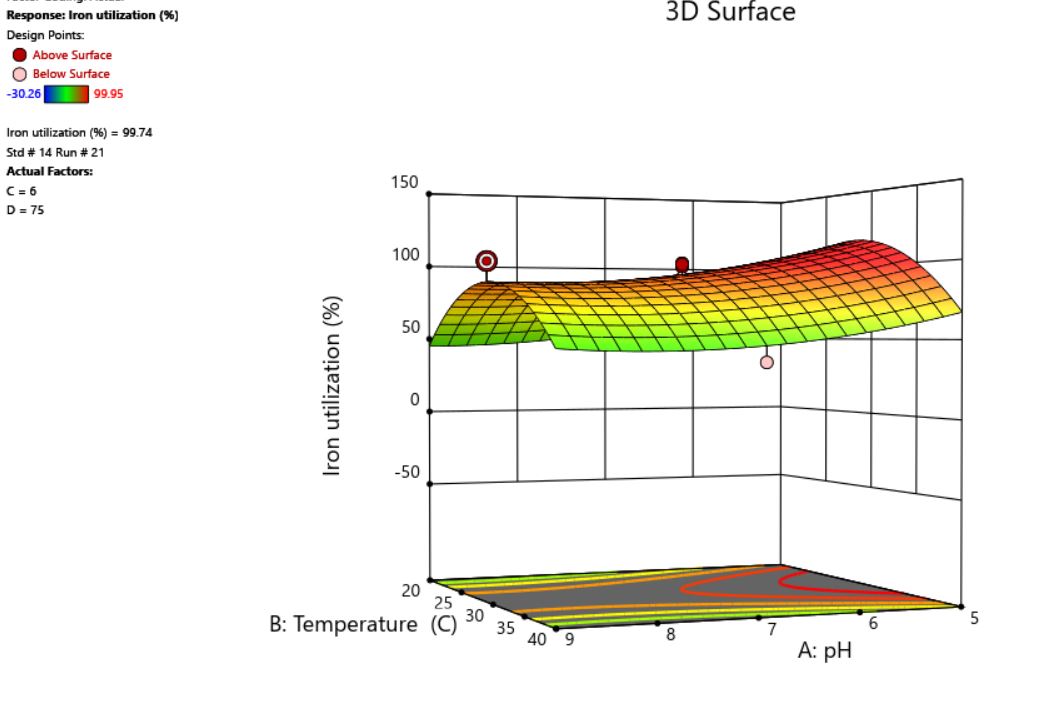


**Siderophore Production %**

**A. pH**

**B. Temperature (℃)**


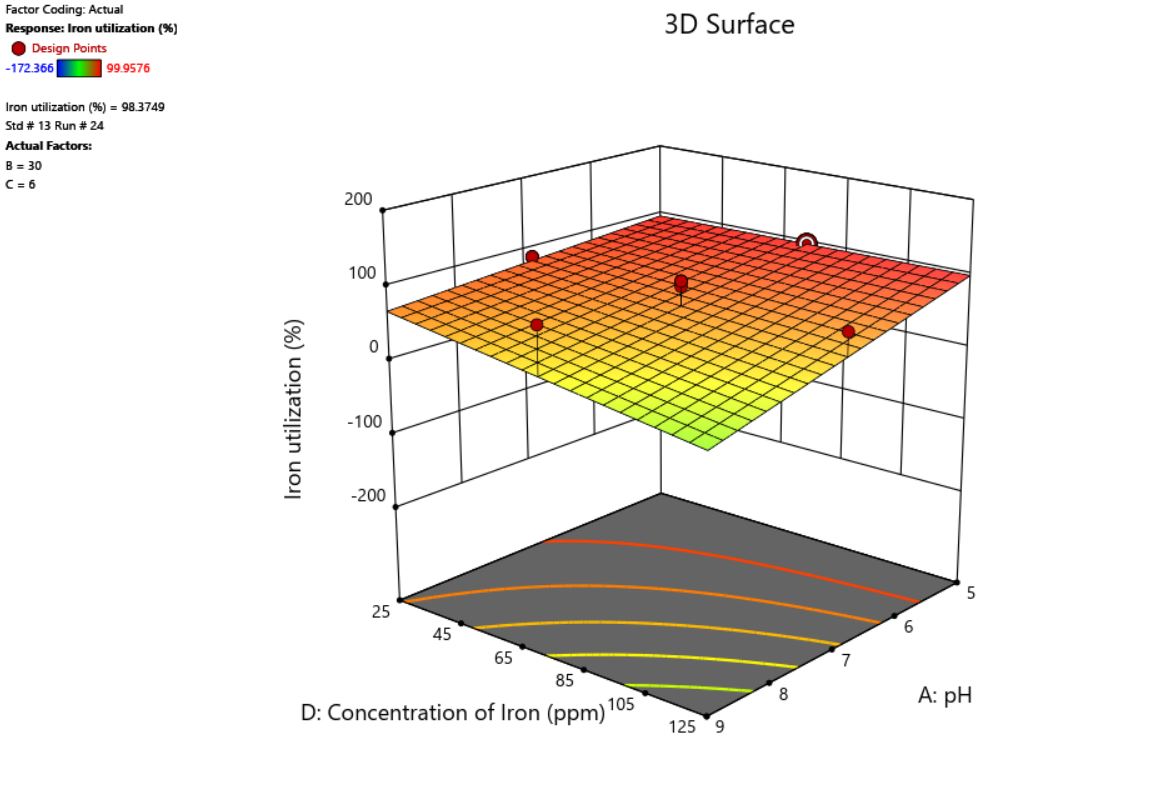


**Siderophore Production %**

**A. pH**

**D. Concentration of Iron (ppm)**

S2) S3)

S4) b)
